# Supplementary material
Source: PubMed Central journal article supplement (PMC2040394)

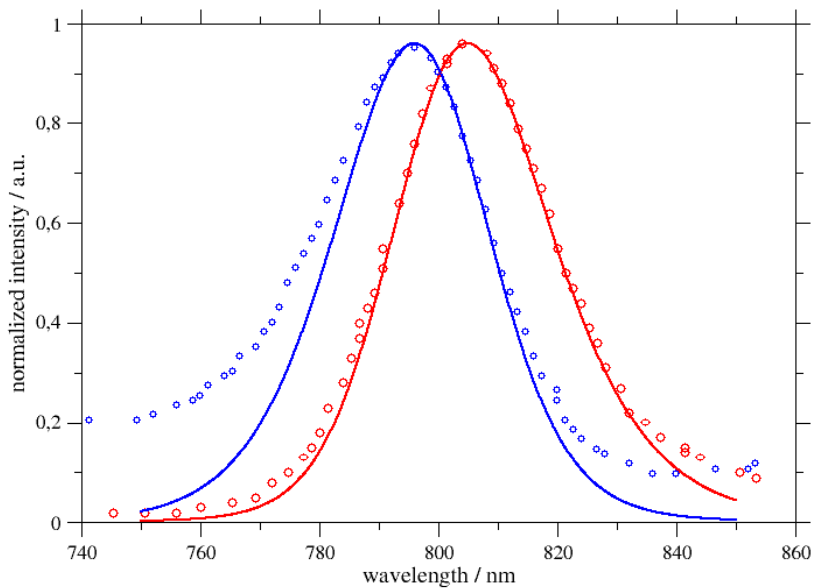

Supplement: pnas_0708222104_7.pdf [file pnas_0708222104_7.pdf]
